# Supplementary material for: Computational screening of two-dimensional conductive metal–organic frameworks as electrocatalysts for the nitric oxide reduction reaction
Source: Royal Society of Chemistry journal article supplement (doi:10.1039/d4ta04275a), 2024-01-01
Supplement: d4ta04275a1.pdf [file d4ta04275a1.pdf]

# **Computational Screening of Two-Dimensional Conductive Metal-Organic Frameworks as Electrocatalysts for Nitric Oxide Reduction Reaction**

*Man Qiao,<sup>\*a</sup> Ye Yue,<sup>b</sup> Jiachi Xie<sup>a</sup> and Dongdong Zhu<sup>\*a</sup>*

<sup>a</sup> School of Chemistry and Materials Science, Institute of Advanced Materials and Flexible Electronics (IAMFE), Nanjing University of Information Science and Technology, Nanjing 210044, China.

E-mail: dd.zhu@nuist.edu.cn, qiaoman@nuist.edu.cn

<sup>b</sup> Reading Academy, Nanjing University of Information Science and Technology, Nanjing 210044, China

**Table S1.** Structural parameters, formation energy and the dissolution energy of  $\text{TM}_3(\text{C}_6\text{O}_6)$ .

| M= | Lattice (Å) | $D_{\text{M-M}}$ (Å) | $D_{\text{M-O}}$ (Å) | $E_{\text{form}}$ (eV) | $U_{\text{diss}}$ (eV) |
|----|-------------|----------------------|----------------------|------------------------|------------------------|
| Sc | 13.93       | 6.99                 | 2.05                 | -6.55                  | 0.10                   |
| Ti | 13.52       | 6.77                 | 1.91                 | -5.21                  | 0.98                   |
| V  | 13.46       | 6.73                 | 1.88                 | -3.98                  | 0.81                   |
| Cr | 13.34       | 6.69                 | 1.94                 | -3.95                  | 1.07                   |
| Mn | 13.16       | 6.58                 | 1.88                 | -4.33                  | 0.98                   |
| Fe | 13.06       | 6.53                 | 1.86                 | -2.17                  | 0.63                   |
| Co | 12.94       | 6.47                 | 1.83                 | -2.18                  | 0.81                   |
| Ni | 12.88       | 6.44                 | 1.83                 | -2.31                  | 0.90                   |
| Cu | 13.21       | 6.60                 | 1.95                 | -1.81                  | 1.25                   |
| Y  | 14.40       | 7.19                 | 2.17                 | -6.49                  | -0.21                  |
| Zr | 14.05       | 7.02                 | 2.04                 | -5.39                  | -0.1                   |
| Nb | 13.85       | 6.92                 | 1.98                 | -4.07                  | 0.26                   |
| Mo | 13.77       | 6.89                 | 1.98                 | -2.56                  | 0.65                   |
| Ru | 13.54       | 6.77                 | 1.96                 | -1.46                  | 1.19                   |
| Rh | 13.46       | 6.73                 | 1.98                 | -1.55                  | 1.37                   |
| Pd | 13.41       | 6.70                 | 1.99                 | -1.59                  | 1.74                   |
| Ag | 14.50       | 7.26                 | 2.27                 | -0.73                  | 1.53                   |
| Hf | 13.95       | 6.97                 | 2.03                 | -5.08                  | -0.28                  |
| Ta | 13.8        | 6.90                 | 1.97                 | -3.97                  | 0.72                   |
| W  | 13.8        | 6.90                 | 1.97                 | -1.45                  | 0.58                   |
| Re | 13.8        | 6.90                 | 1.99                 | -0.60                  | 0.50                   |
| Os | 13.64       | 6.82                 | 1.95                 | -0.69                  | 0.93                   |
| Ir | 13.59       | 6.79                 | 1.98                 | -0.73                  | 1.40                   |
| Pt | 13.52       | 6.76                 | 1.98                 | -1.19                  | 1.77                   |
| Au | 13.45       | 6.73                 | 1.99                 | 0.06                   | 1.48                   |

**Table S2.** The Gibbs free energies of NO ( $\Delta G_{*NO}$ ), N<sub>2</sub> molecule ( $\Delta G_{*N_2}$ ), and NH<sub>3</sub> molecule ( $\Delta G_{*NH_3}$ ) on TM<sub>3</sub>(C<sub>6</sub>O<sub>6</sub>)<sub>2</sub>.

| M= | $\Delta G_{ad}$ (NO) (eV) | $\Delta G_{ad}$ (N <sub>2</sub> ) (eV) | $\Delta G_{ad}$ (NH <sub>3</sub> ) (eV) |
|----|---------------------------|----------------------------------------|-----------------------------------------|
| Ti | -0.38                     | 0.08                                   | -0.50                                   |
| V  | -1.35                     | 0.29                                   | -0.75                                   |
| Cr | -1.61                     | 0.02                                   | -1.30                                   |
| Mn | -0.70                     | 0.47                                   | -0.66                                   |
| Fe | -1.19                     | 0.46                                   | -0.75                                   |
| Co | -1.01                     | 0.23                                   | -0.97                                   |
| Nb | -4.69                     | -0.57                                  | -0.60                                   |
| Mo | -2.65                     | -0.47                                  | -1.59                                   |
| Ru | -2.06                     | -0.29                                  | -1.14                                   |
| Rh | -1.45                     | 0.4                                    | -1.13                                   |
| W  | -3.01                     | 0.49                                   | -1.46                                   |
| Re | -2.60                     | -0.21                                  | -1.18                                   |
| Os | -2.24                     | -0.06                                  | -0.95                                   |
| Ir | -1.47                     | 0.52                                   | -1.19                                   |

**Table S3.** The Gibbs free energies ( $\Delta G_{*NO}$ ), N-O bond, N-N bond and transfer charge of TM atoms of adsorbed NO on TM<sub>3</sub>(C<sub>6</sub>O<sub>6</sub>)<sub>2</sub>

| M= | $\Delta G_{ad}$ (NO) (eV) | $L_{N-O}$ (Å) | $D_{M-N}$ (Å) | Charge ( e ) |
|----|---------------------------|---------------|---------------|--------------|
| V  | -1.35                     | 1.22          | 1.69          | 0.42         |
| Cr | -1.61                     | 1.19          | 1.66          | 0.26         |
| Mn | -0.70                     | 1.19          | 1.63          | 0.23         |
| Fe | -1.19                     | 1.18          | 1.64          | 0.11         |
| Co | -1.01                     | 1.17          | 1.65          | 0.13         |
| Nb | -4.69                     | 1.26          | 1.82          | 0.56         |
| Mo | -2.65                     | 1.22          | 1.74          | 0.53         |
| Ru | -2.06                     | 1.18          | 1.71          | 0.28         |
| Rh | -1.45                     | 1.18          | 1.93          | 0.12         |
| W  | -3.01                     | 1.23          | 1.75          | 0.57         |
| Re | -2.60                     | 1.20          | 1.73          | 0.46         |
| Os | -2.24                     | 1.19          | 1.72          | 0.26         |
| Ir | -1.47                     | 1.19          | 1.94          | 0.16         |

**Table S4.** Elementary steps for the considered pathways of NO-to-NH<sub>3</sub> conversion on nine TM<sub>3</sub>(C<sub>6</sub>O<sub>6</sub>)<sub>2</sub>.

| $\Delta G$ (eV)                                                                             | V     | Mn    | Fe    | Mo    | Ru    |
|---------------------------------------------------------------------------------------------|-------|-------|-------|-------|-------|
| *NO + H <sup>+</sup> + e <sup>-</sup> → *NOH                                                | 0.49  | 0.60  | 0.80  | /     | 0.20  |
| *NO + H <sup>+</sup> + e <sup>-</sup> → *NHO                                                | 0.20  | 0.02  | 0.28  | 0.01  | 0.61  |
| *NOH + H <sup>+</sup> + e <sup>-</sup> → *N + H <sub>2</sub> O                              | -1.15 | -1.12 | -0.45 | /     | -1.59 |
| *NOH + H <sup>+</sup> + e <sup>-</sup> → *NHOH                                              | -0.55 | -0.13 | -0.35 | /     | -0.11 |
| *NHO + H <sup>+</sup> + e <sup>-</sup> → *NHOH                                              | -0.26 | 0.46  | 0.18  | 0.04  | -0.51 |
| *NHO + H <sup>+</sup> + e <sup>-</sup> → *NH <sub>2</sub> O                                 | 0.28  | -0.10 | 0.07  | -0.19 | -1.02 |
| *N + H <sup>+</sup> + e <sup>-</sup> → *NH                                                  | -0.88 | -0.02 | -0.54 | -0.68 | -0.36 |
| *NHOH + H <sup>+</sup> + e <sup>-</sup> → *NH <sub>2</sub> OH                               | 0.08  | -1.24 | -0.84 | -1.05 | 0.22  |
| *NHOH + H <sup>+</sup> + e <sup>-</sup> → *NH + H <sub>2</sub> O                            | -1.47 | -1.01 | -0.65 | 0.36  | -1.85 |
| *NH <sub>2</sub> O + H <sup>+</sup> + e <sup>-</sup> → *NH <sub>2</sub> OH                  | -0.46 | -0.68 | -0.72 | -0.83 | 0.72  |
| *NH + H <sup>+</sup> + e <sup>-</sup> → *NH <sub>2</sub>                                    | -0.73 | -1.40 | -1.46 | -2.03 | -0.31 |
| *NH <sub>2</sub> OH + H <sup>+</sup> + e <sup>-</sup> → *NH <sub>2</sub> + H <sub>2</sub> O | -2.28 | -1.16 | -1.27 | -0.62 | -2.37 |
| *NH <sub>2</sub> + H <sup>+</sup> + e <sup>-</sup> → *NH <sub>3</sub>                       | -0.61 | -1.50 | -1.37 | -1.80 | -0.35 |
| *NH <sub>3</sub> → * + NH <sub>3</sub>                                                      | 0.73  | 0.64  | 0.73  | 0.95  | 1.57  |
| * + H <sup>+</sup> + e <sup>-</sup> → *H                                                    | 0.47  | 0.70  | 0.71  | 0.17  | -0.36 |

| $\Delta G$ (eV)                                                                             | Rh    | W     | Ir    | Co    |
|---------------------------------------------------------------------------------------------|-------|-------|-------|-------|
| *NO + H <sup>+</sup> + e <sup>-</sup> → *NOH                                                | 0.65  | 0.72  | 0.07  | /     |
| *NO + H <sup>+</sup> + e <sup>-</sup> → *NHO                                                | 0.23  | 0.26  | 0.58  | 0.02  |
| *NOH + H <sup>+</sup> + e <sup>-</sup> → *N + H <sub>2</sub> O                              | -1.36 | 2.08  | -1.34 | /     |
| *NOH + H <sup>+</sup> + e <sup>-</sup> → *NHOH                                              | -0.29 | -0.51 | 0.05  | /     |
| *NHO + H <sup>+</sup> + e <sup>-</sup> → *NHOH                                              | 0.13  | -0.05 | -0.45 | 0.19  |
| *NHO + H <sup>+</sup> + e <sup>-</sup> → *NH <sub>2</sub> O                                 | 0.63  | -0.22 | -1.05 | 0.20  |
| *N + H <sup>+</sup> + e <sup>-</sup> → *NH                                                  | 0.40  | -3.01 | -0.79 | /     |
| *NHOH + H <sup>+</sup> + e <sup>-</sup> → *NH <sub>2</sub> OH                               | -0.49 | -0.91 | 0.68  | -1.00 |
| *NHOH + H <sup>+</sup> + e <sup>-</sup> → *NH + H <sub>2</sub> O                            | -0.68 | -0.42 | -2.18 | /     |
| *NH <sub>2</sub> O + H <sup>+</sup> + e <sup>-</sup> → *NH <sub>2</sub> OH                  | -0.99 | -0.74 | 1.28  | -1.02 |
| *NH + H <sup>+</sup> + e <sup>-</sup> → *NH <sub>2</sub>                                    | -1.18 | -1.14 | -0.15 | /     |
| *NH <sub>2</sub> OH + H <sup>+</sup> + e <sup>-</sup> → *NH <sub>2</sub> + H <sub>2</sub> O | -1.37 | -0.66 | -3.00 | -0.90 |
| *NH <sub>2</sub> + H <sup>+</sup> + e <sup>-</sup> → *NH <sub>3</sub>                       | -1.06 | -1.79 | 0.28  | -1.49 |
| *NH <sub>3</sub> → * + NH <sub>3</sub>                                                      | 1.12  | 1.11  | 1.44  | 1.17  |
| * + H <sup>+</sup> + e <sup>-</sup> → *H                                                    | 0.65  | 0.72  | 0.07  | /     |

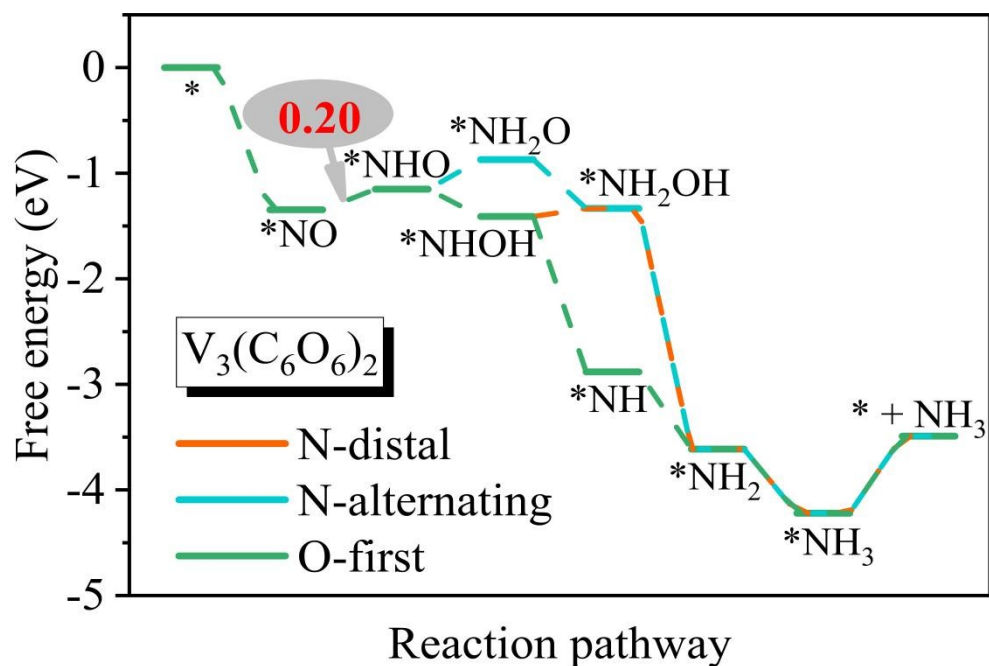

Fig. S1. The free energy diagram of NO reduction to  $NH_3$  on  $V_3(C_6O_6)_2$ .

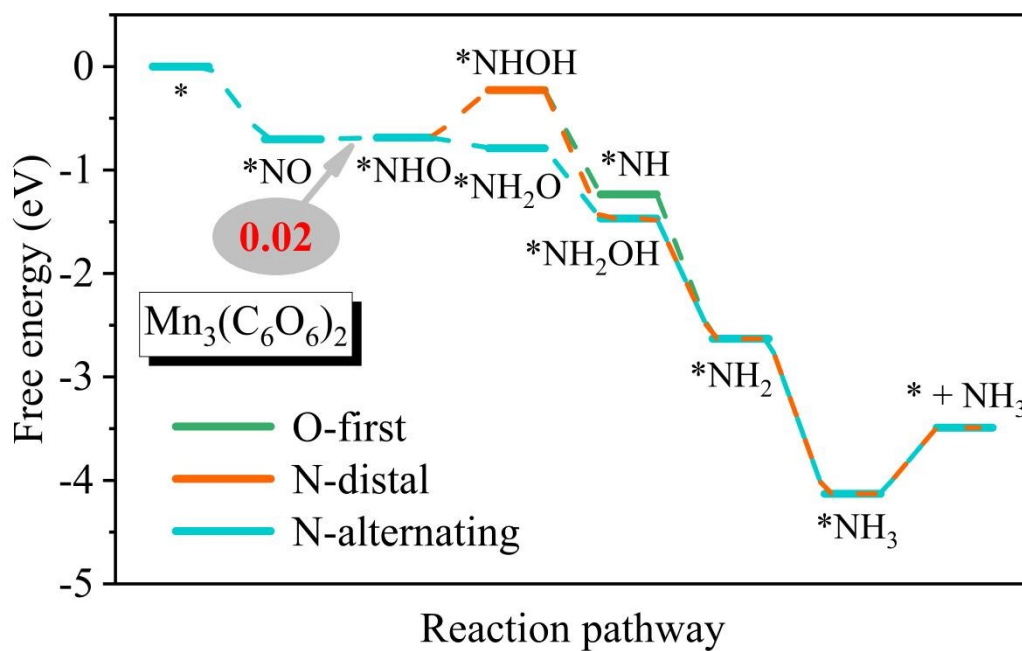

Fig. S2. The free energy diagram of NO reduction to  $NH_3$  on  $Mn_3(C_6O_6)_2$ .

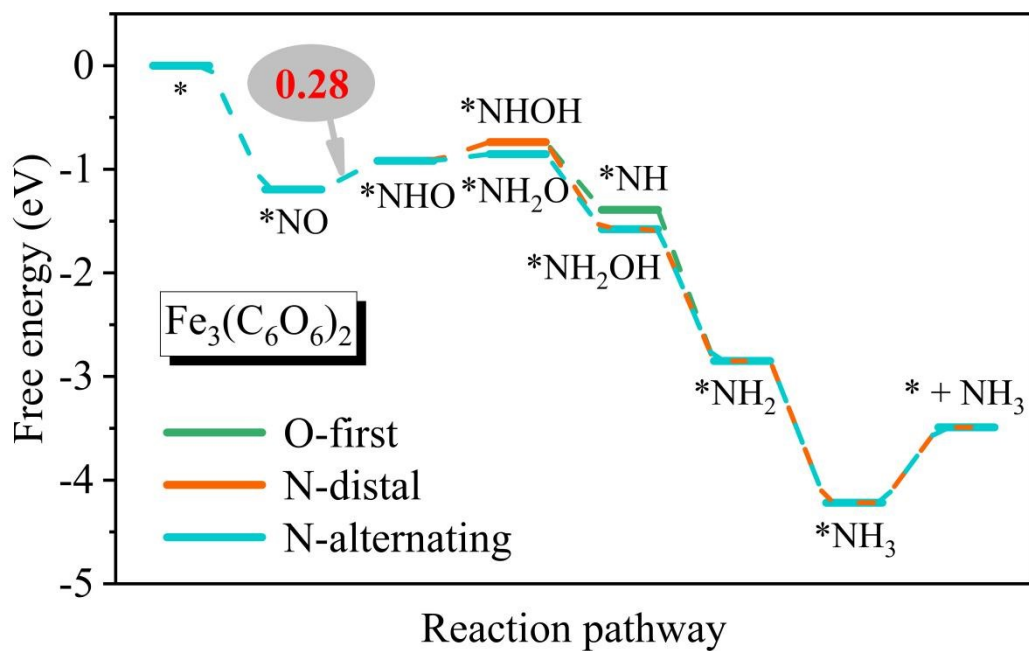

**Fig. S3.** The free energy diagram of NO reduction to  $\text{NH}_3$  on  $\text{Mn}_3(\text{C}_6\text{O}_6)_2$ .

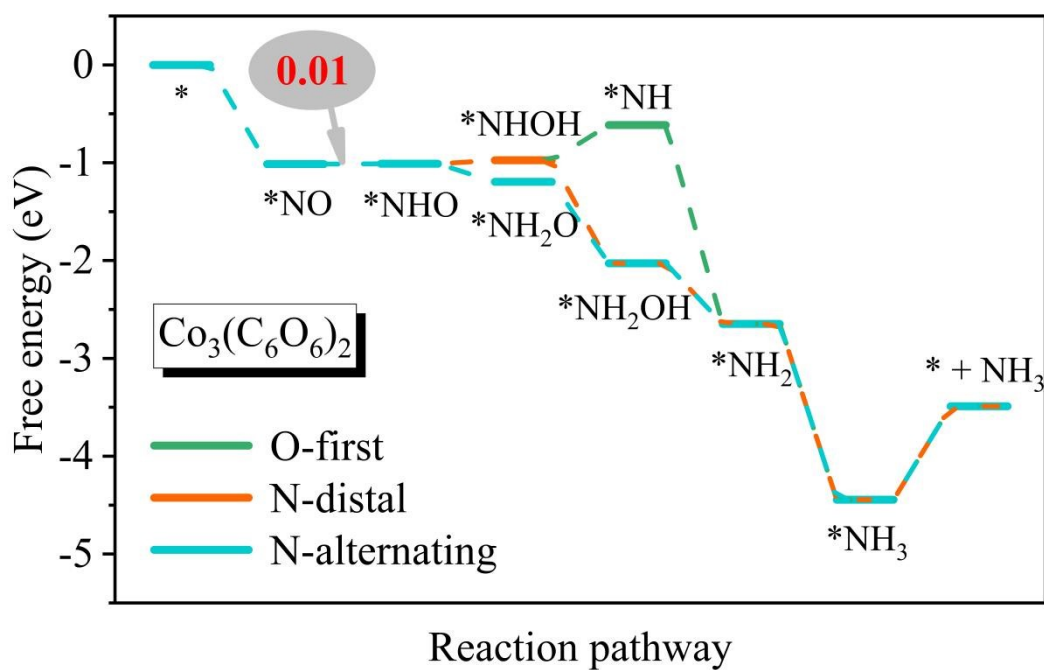

**Fig. S4.** The free energy diagram of NO reduction to  $\text{NH}_3$  on  $\text{Co}_3(\text{C}_6\text{O}_6)_2$ .

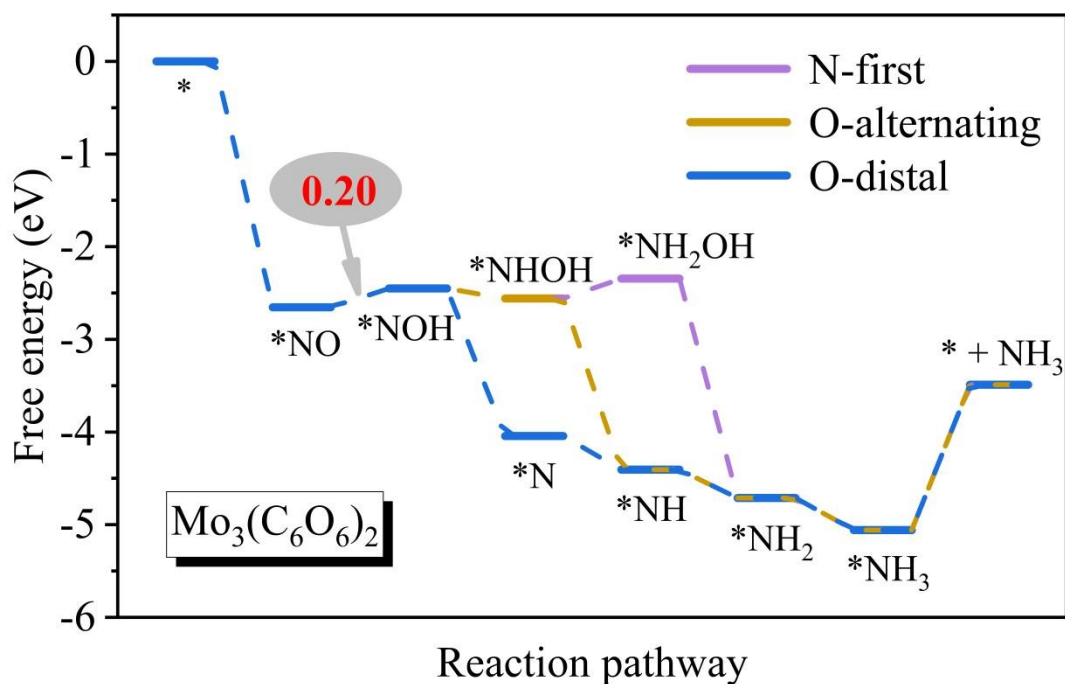

Fig. S5. The free energy diagram of NO reduction to NH<sub>3</sub> on Mo<sub>3</sub>(C<sub>6</sub>O<sub>6</sub>)<sub>2</sub>.

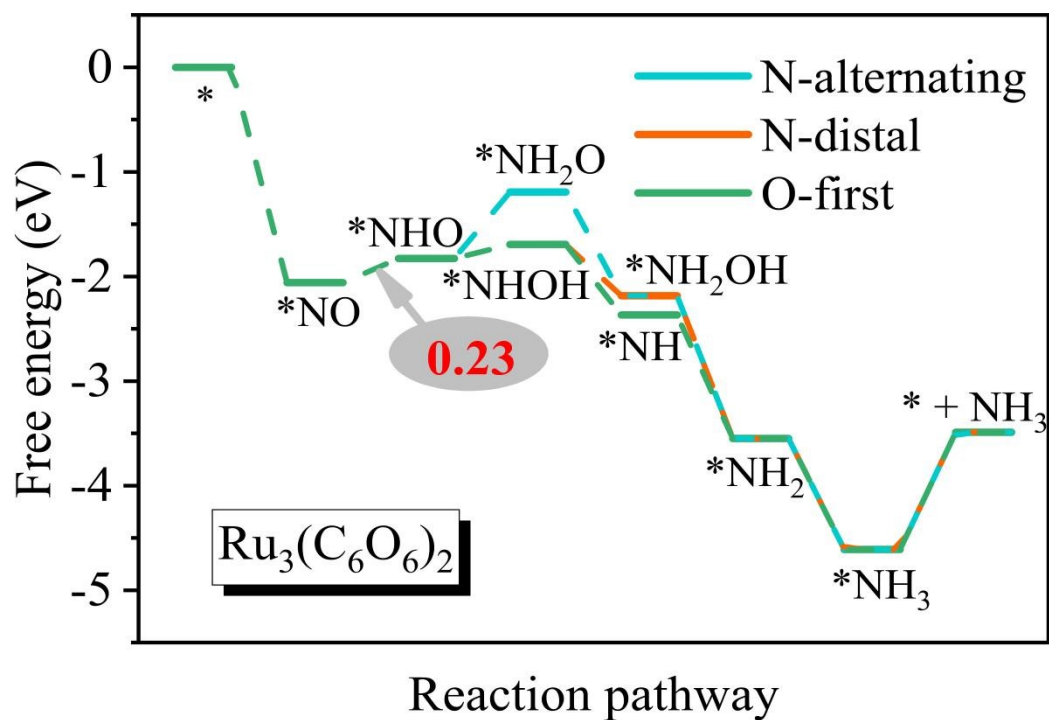

Fig. S6. The free energy diagram of NO reduction to NH<sub>3</sub> on Mo<sub>3</sub>(C<sub>6</sub>O<sub>6</sub>)<sub>2</sub>.

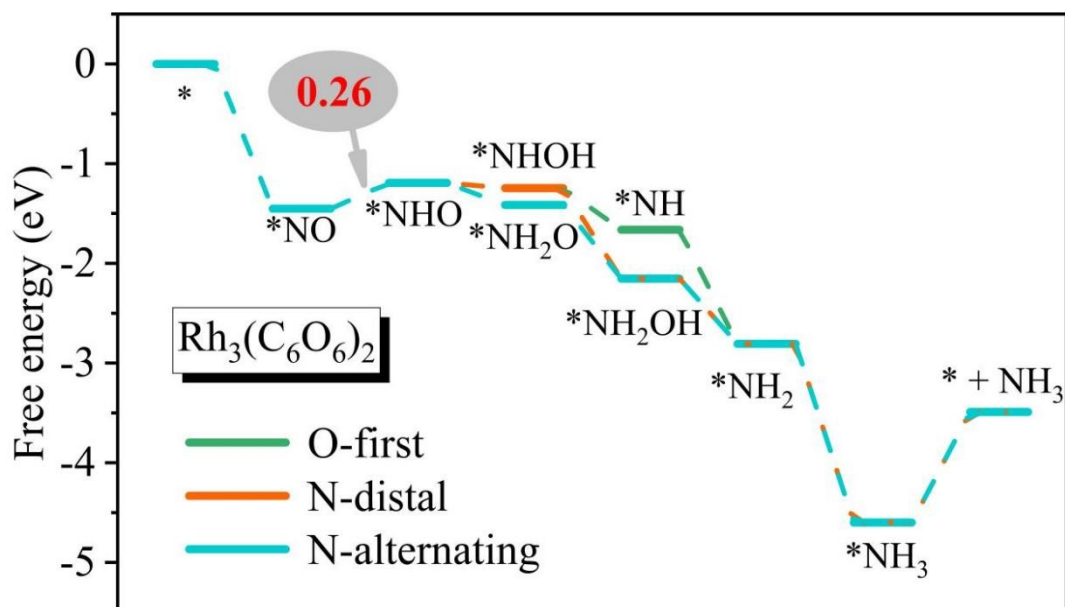

Reaction pathway

Fig. S7. The free energy diagram of NO reduction to NH<sub>3</sub> on Rh<sub>3</sub>(C<sub>6</sub>O<sub>6</sub>)<sub>2</sub>.

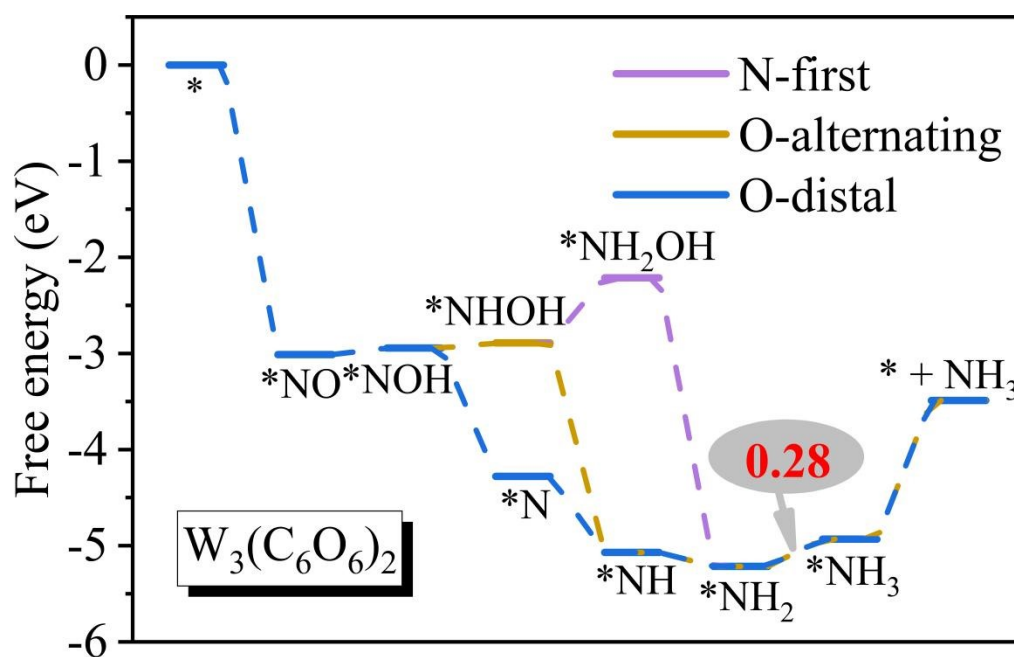

Reaction pathway

Fig. S8. The free energy diagram of NO reduction to NH<sub>3</sub> on W<sub>3</sub>(C<sub>6</sub>O<sub>6</sub>)<sub>2</sub>.



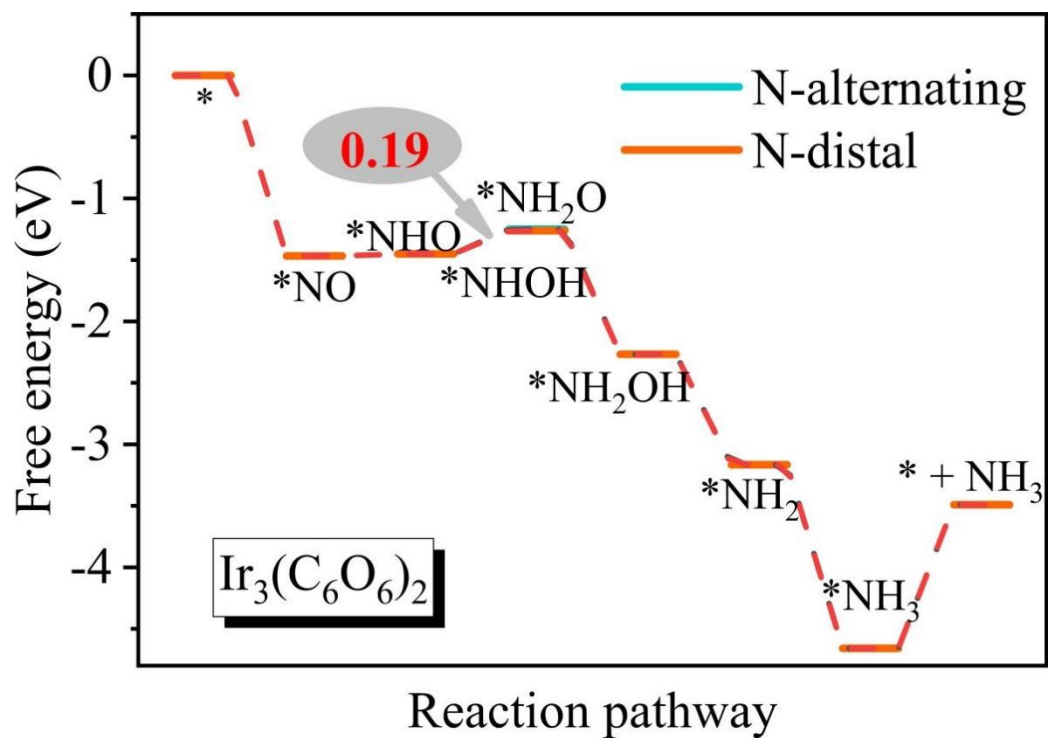

Fig. S9. The free energy diagram of NO reduction to NH<sub>3</sub> on Ir<sub>3</sub>(C<sub>6</sub>O<sub>6</sub>)<sub>2</sub>.

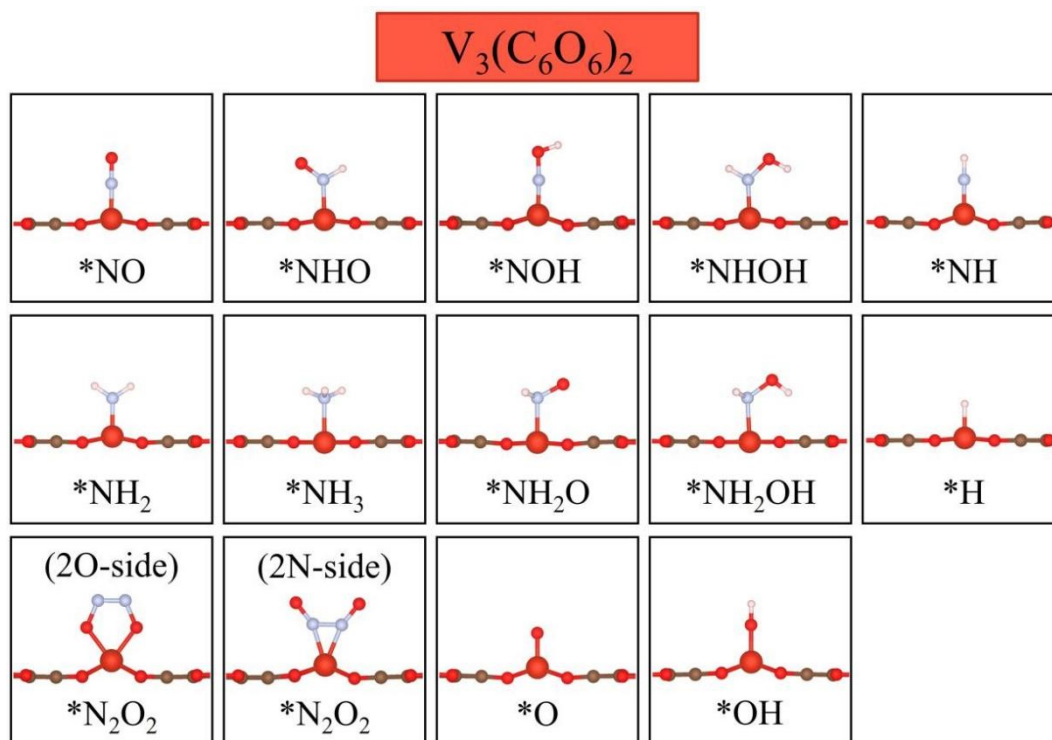

Fig. S10. Optimized intermediates of the NORR via different pathways on V<sub>3</sub>(C<sub>6</sub>O<sub>6</sub>)<sub>2</sub>.

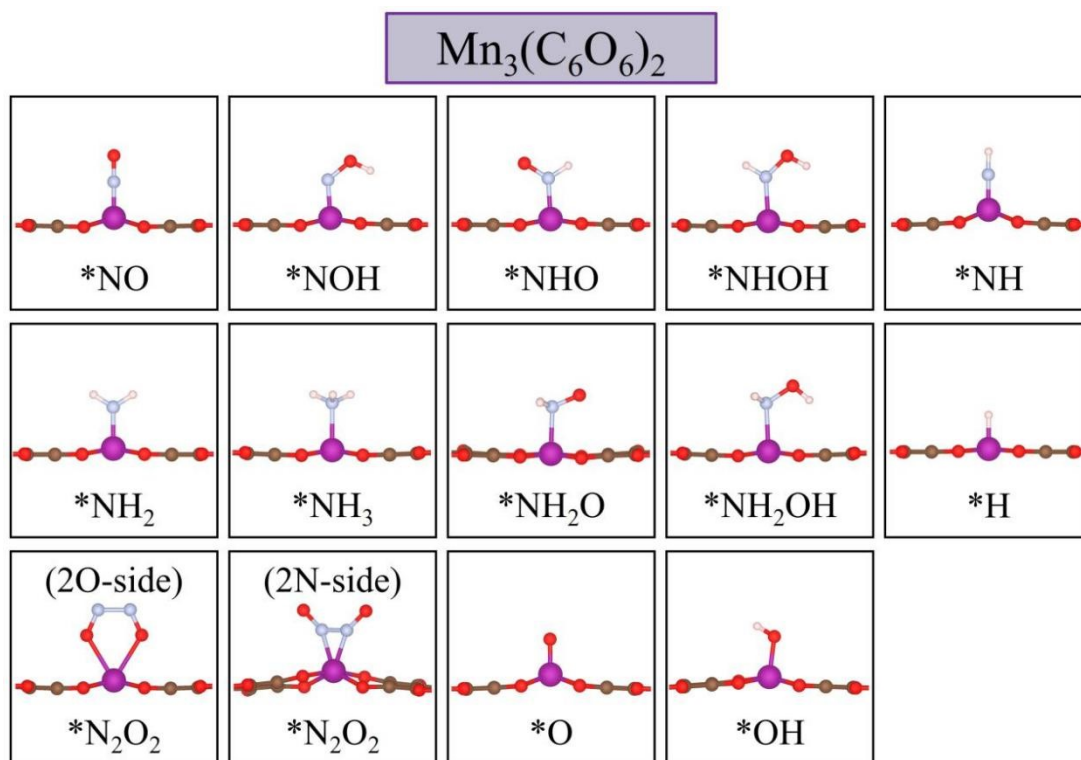

**Fig. S11.** Optimized intermediates of the NORR via different pathways on Mn<sub>3</sub>(C<sub>6</sub>O<sub>6</sub>)<sub>2</sub>.

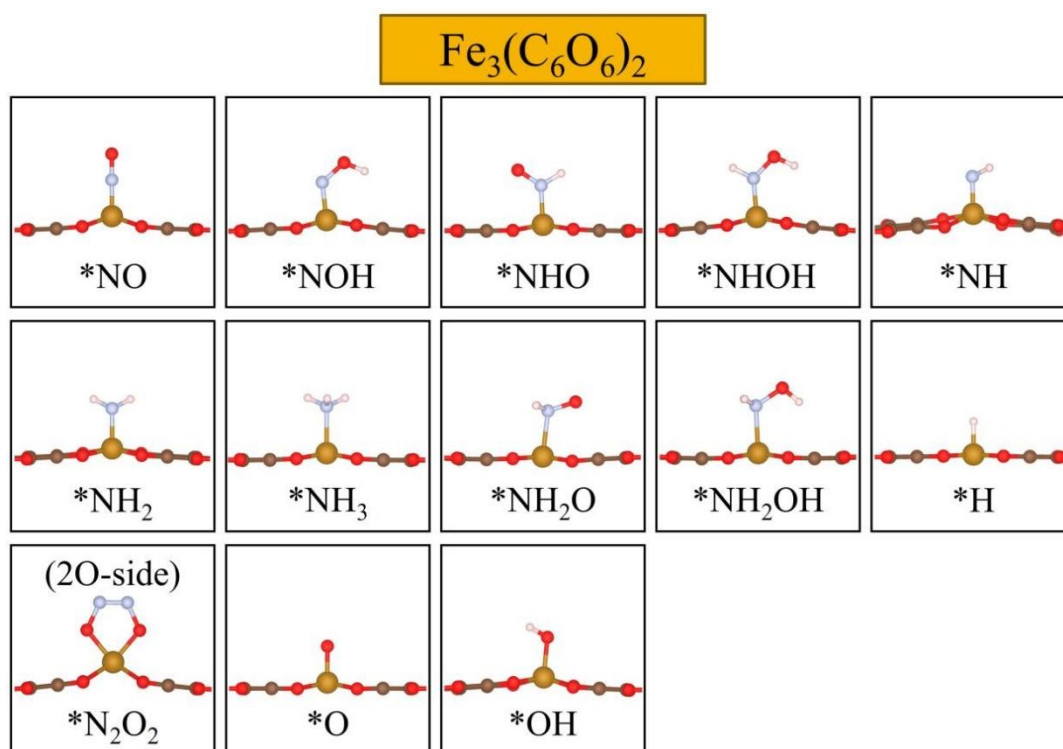

**Fig. S12.** Optimized intermediates of the NORR via different pathways on Mn<sub>3</sub>(C<sub>6</sub>O<sub>6</sub>)<sub>2</sub>.

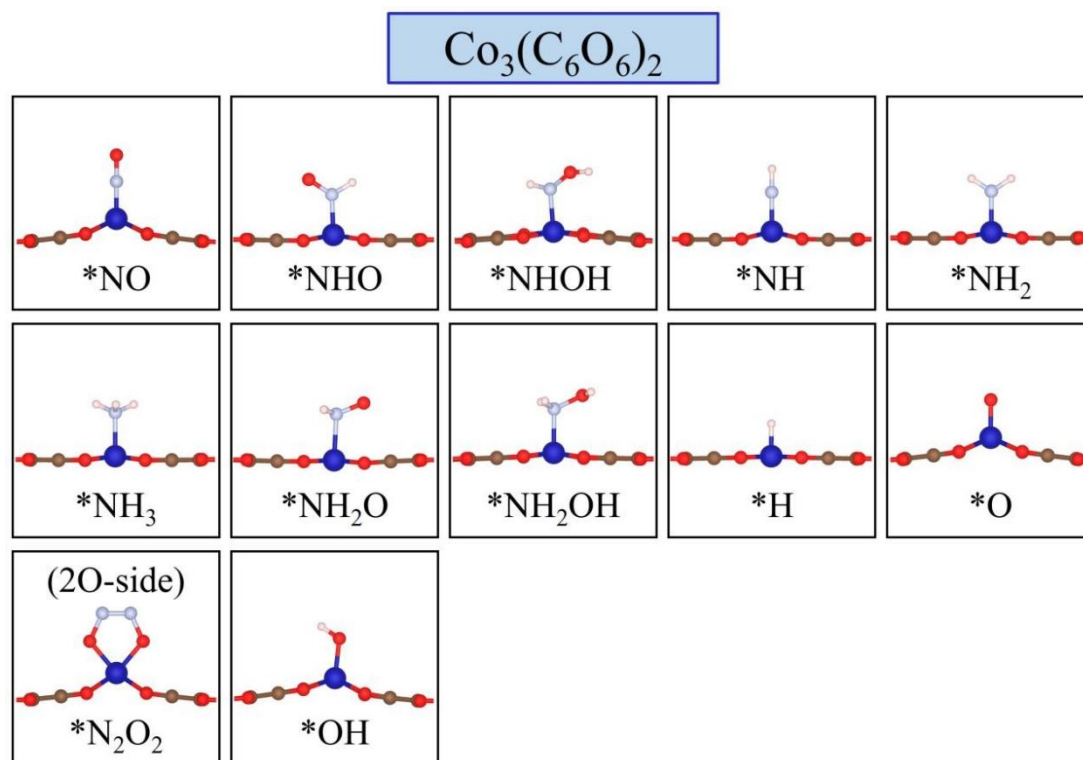

**Fig. S13.** Optimized intermediates of the NORR via different pathways on  $\text{Co}_3(\text{C}_6\text{O}_6)_2$ .

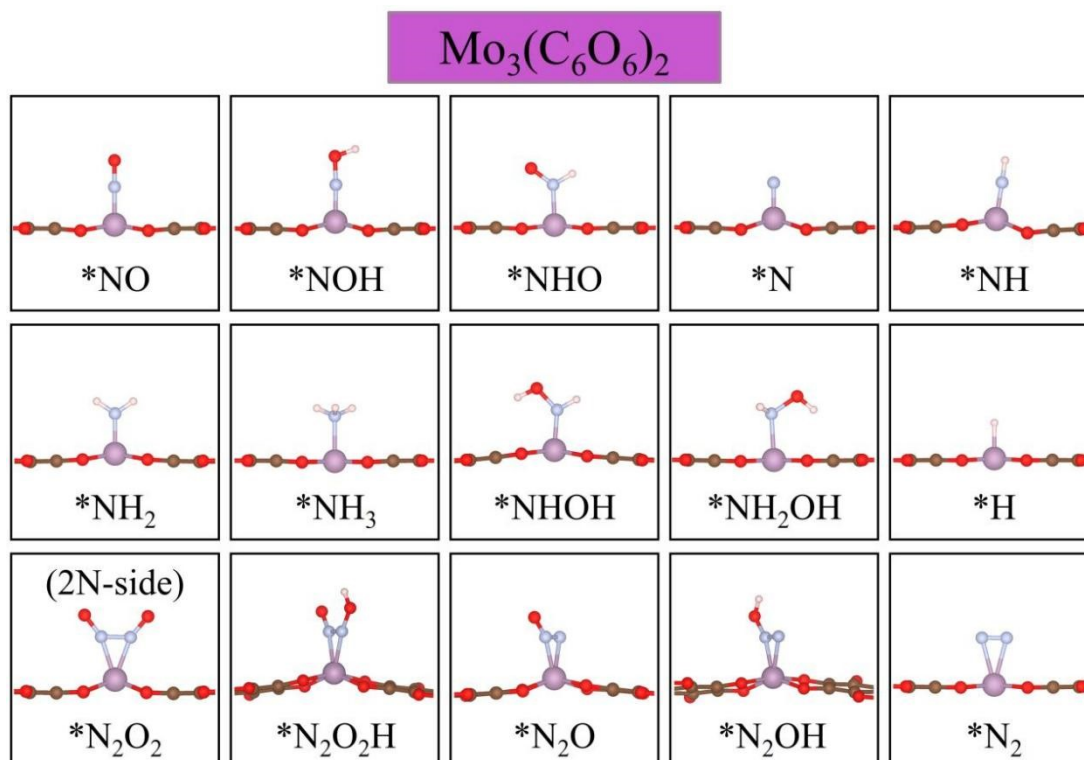

**Fig. S14.** Optimized intermediates of the NORR via different pathways on  $\text{Mo}_3(\text{C}_6\text{O}_6)_2$ .

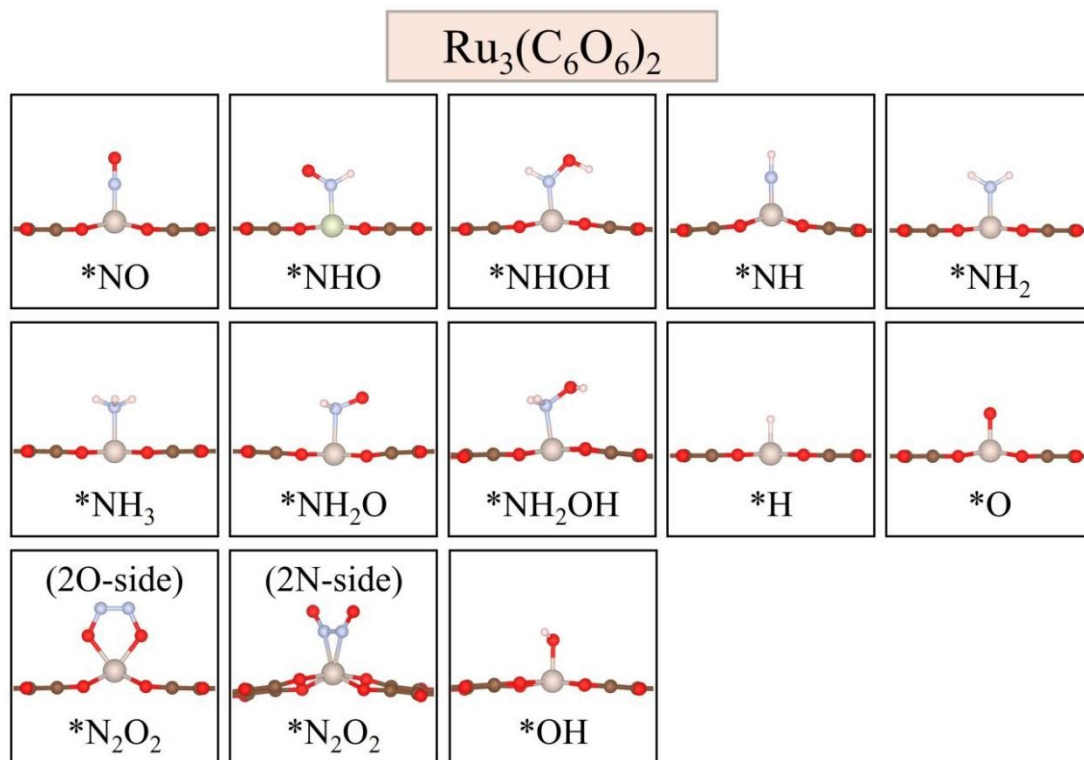

**Fig. S15.** Optimized intermediates of the NORR via different pathways on  $\text{Ru}_3(\text{C}_6\text{O}_6)_2$ .

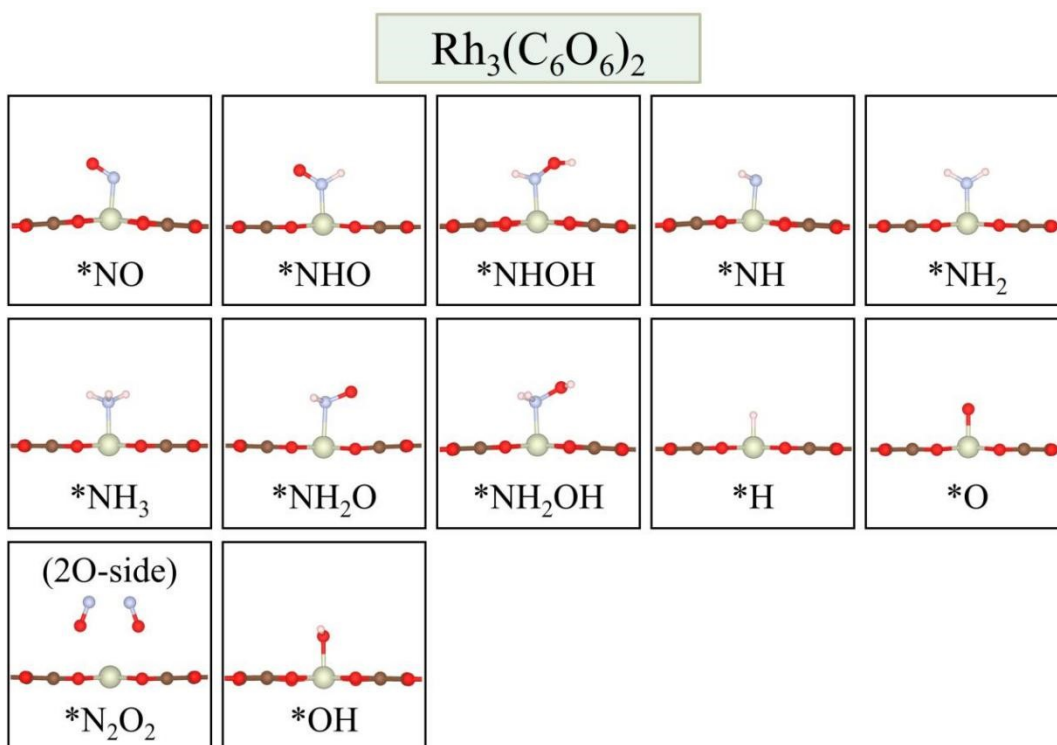

**Fig. S16.** Optimized intermediates of the NORR via different pathways on  $\text{Rh}_3(\text{C}_6\text{O}_6)_2$ .

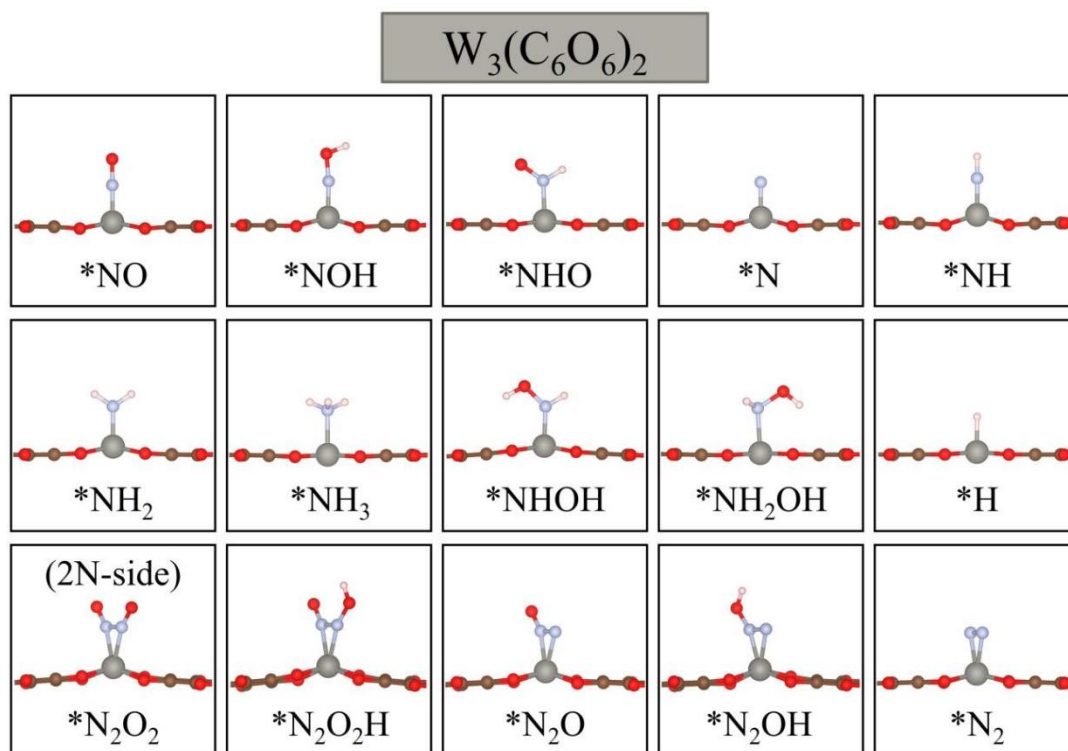

**Fig. S17.** Optimized intermediates of the NORR via different pathways on  $W_3(C_6O_6)_2$ .

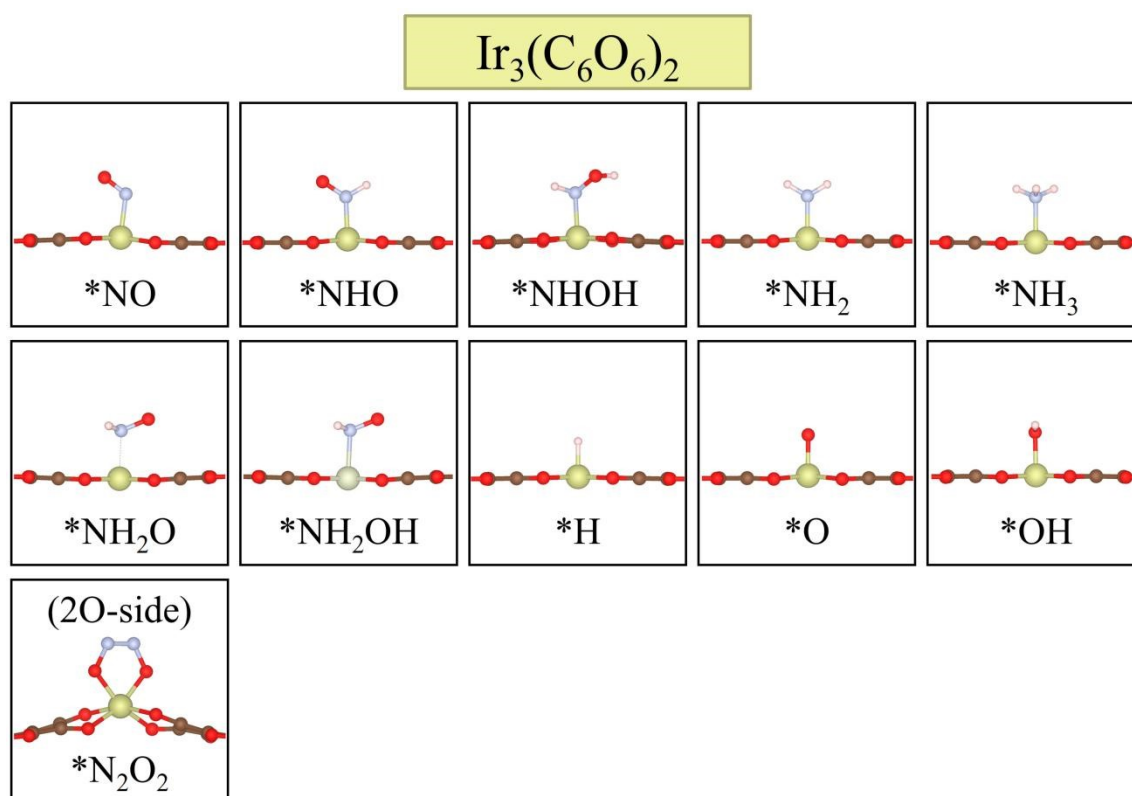

**Fig. S18.** Optimized intermediates of the NORR via different pathways on  $Ir_3(C_6O_6)_2$ .

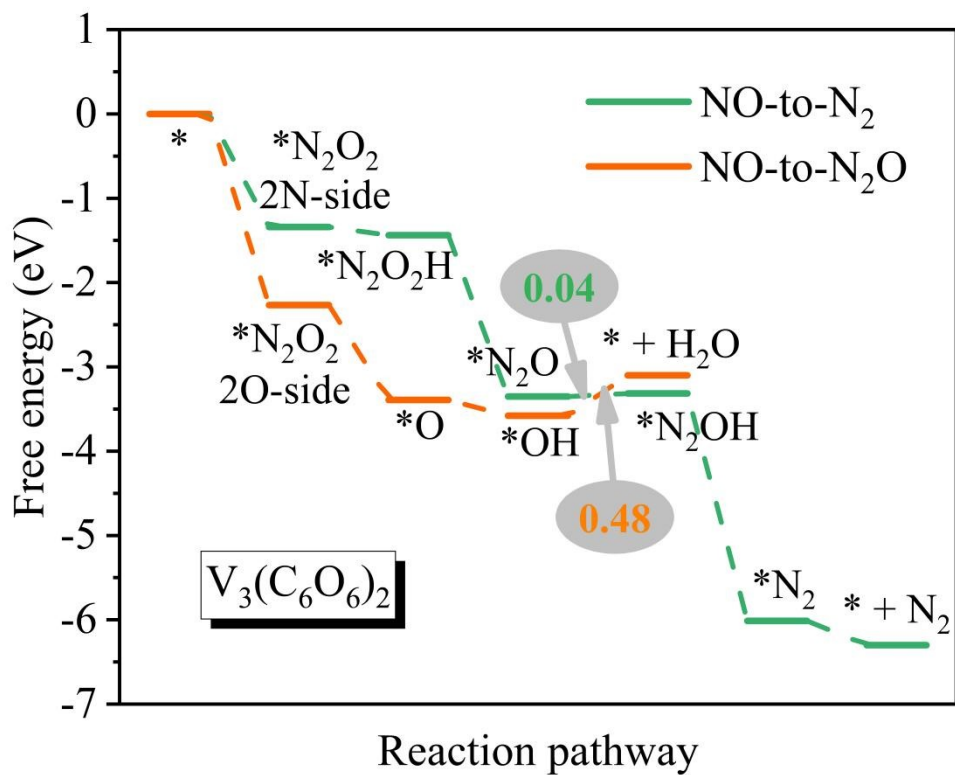

**Fig. S19.** The free energy diagram of NO reduction to  $N_2O$  and  $N_2$  on  $V_3(C_6O_6)_2$ .

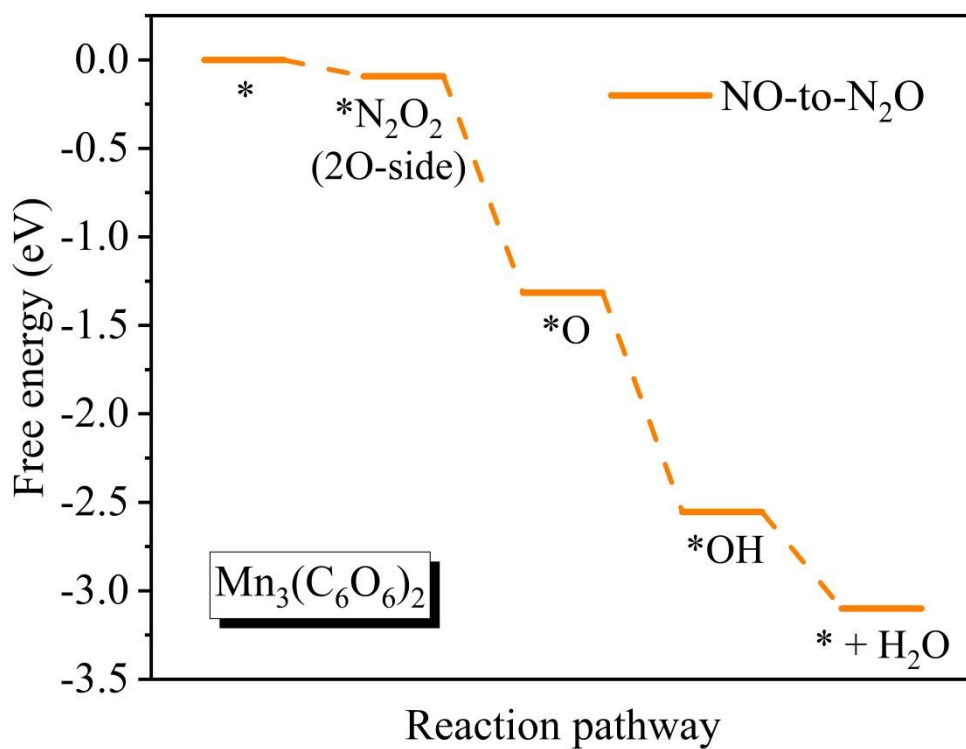

**Fig. S20.** The free energy diagram of NO reduction to  $N_2O$  on  $Mn_3(C_6O_6)_2$ .

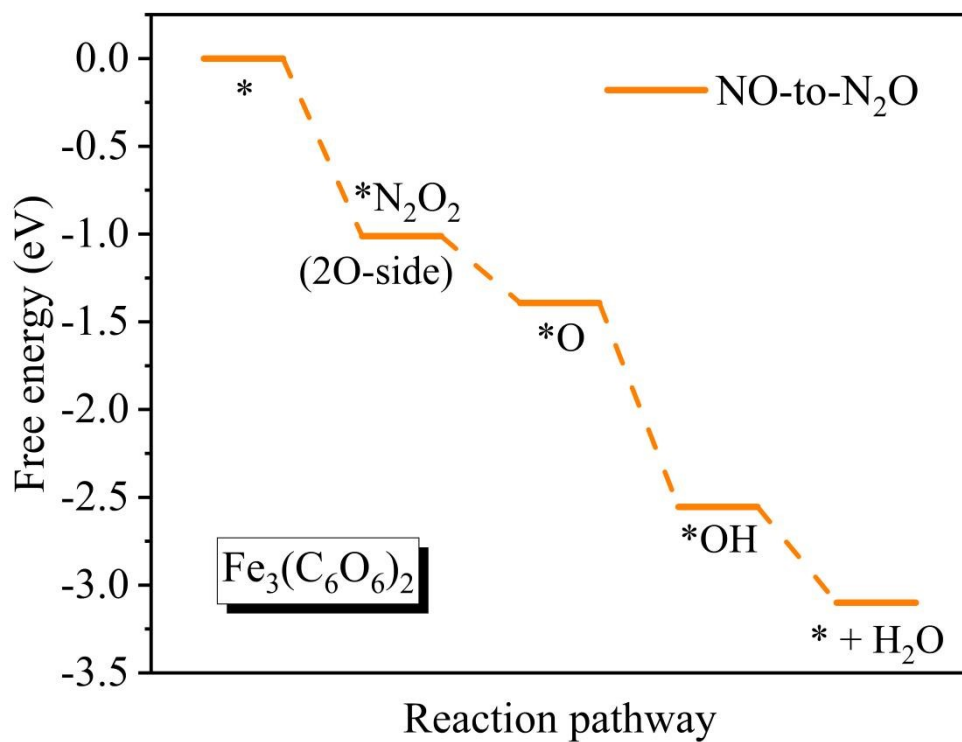

**Fig. S21.** The free energy diagram of NO reduction to N<sub>2</sub>O on Fe<sub>3</sub>(C<sub>6</sub>O<sub>6</sub>)<sub>2</sub>.

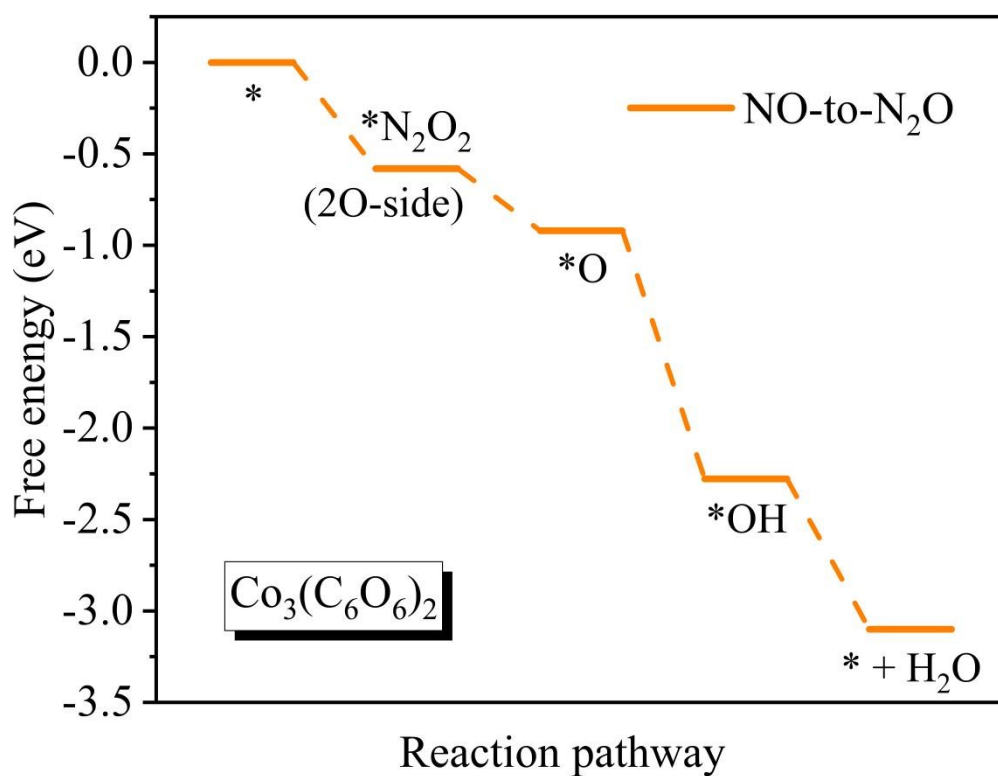

**Fig. S22.** The free energy diagram of NO reduction to N<sub>2</sub>O on Co<sub>3</sub>(C<sub>6</sub>O<sub>6</sub>)<sub>2</sub>.

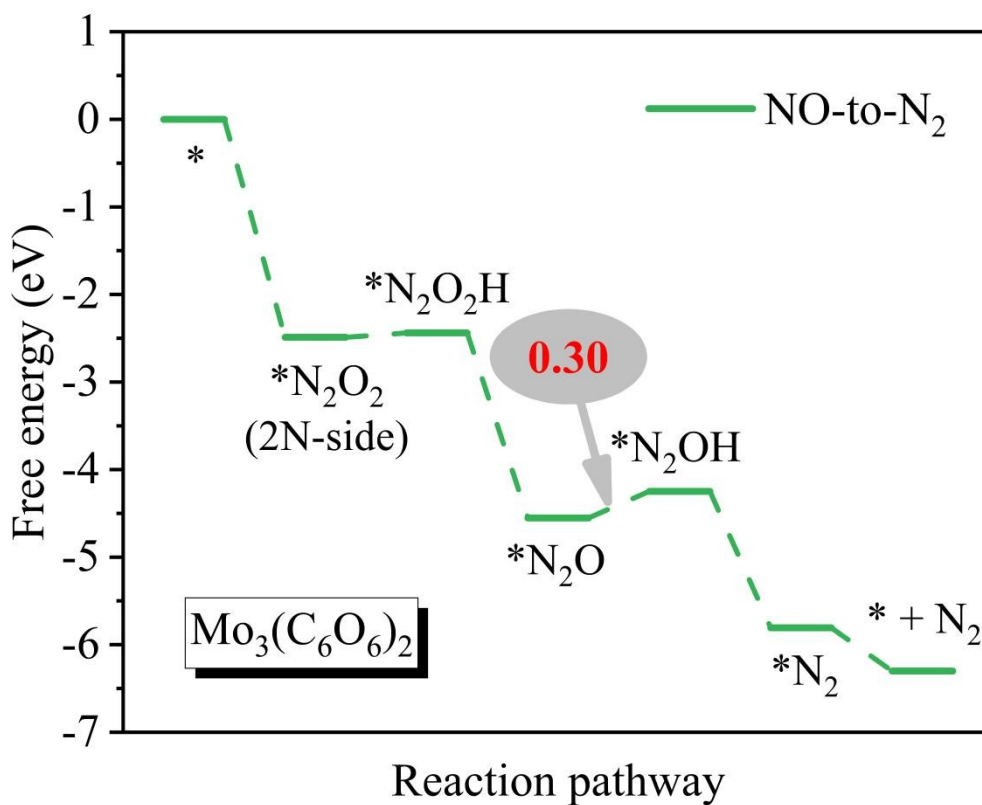

Fig. S23. The free energy diagram of NO reduction to N<sub>2</sub> on Mo<sub>3</sub>(C<sub>6</sub>O<sub>6</sub>)<sub>2</sub>.

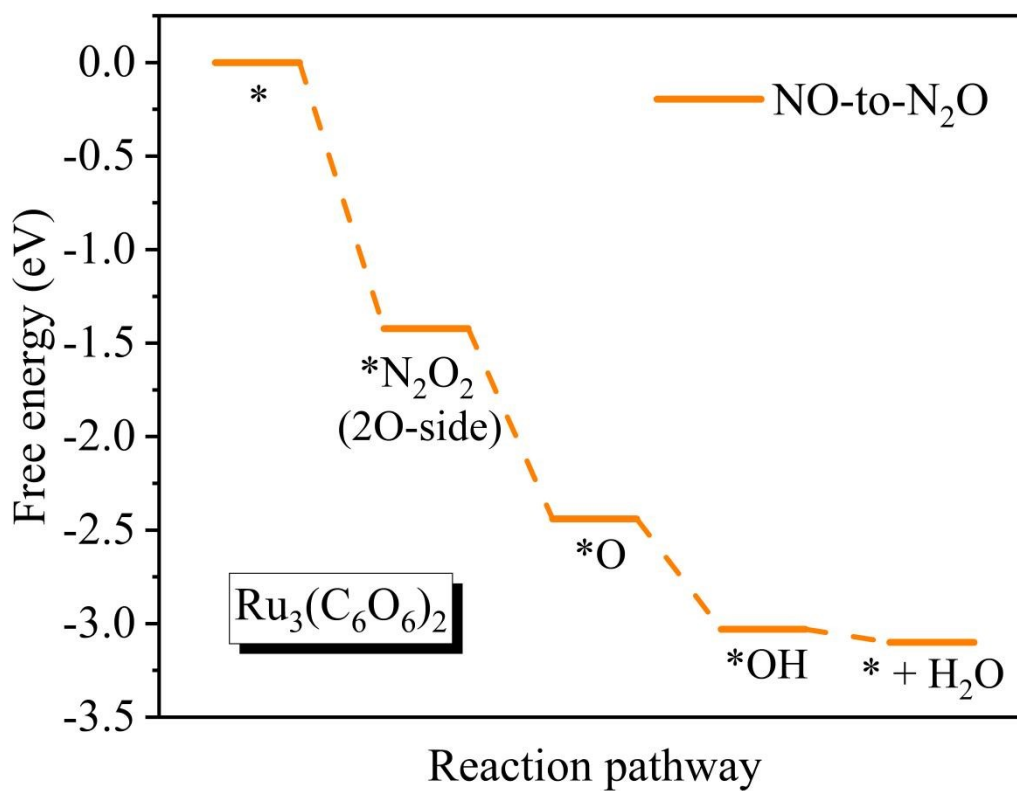

Fig. S24. The free energy diagram of NO reduction to N<sub>2</sub>O on Ru<sub>3</sub>(C<sub>6</sub>O<sub>6</sub>)<sub>2</sub>.



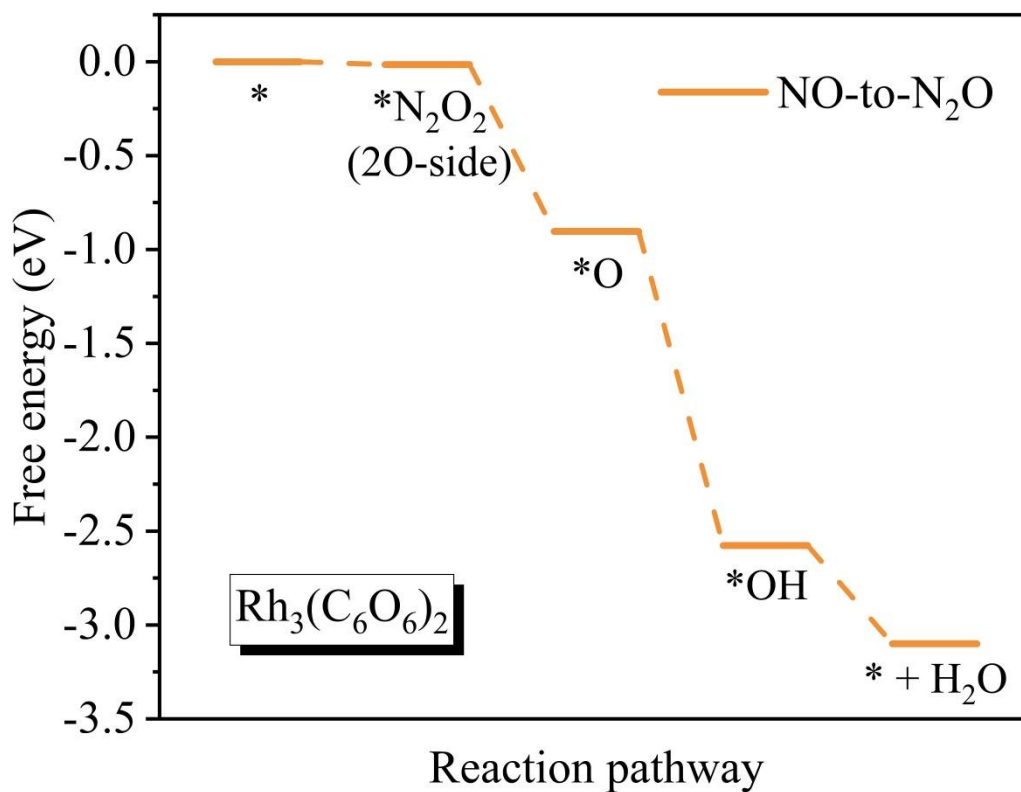

Fig. S25. The free energy diagram of NO reduction to  $\text{N}_2\text{O}$  on  $\text{Rh}_3(\text{C}_6\text{O}_6)_2$ .

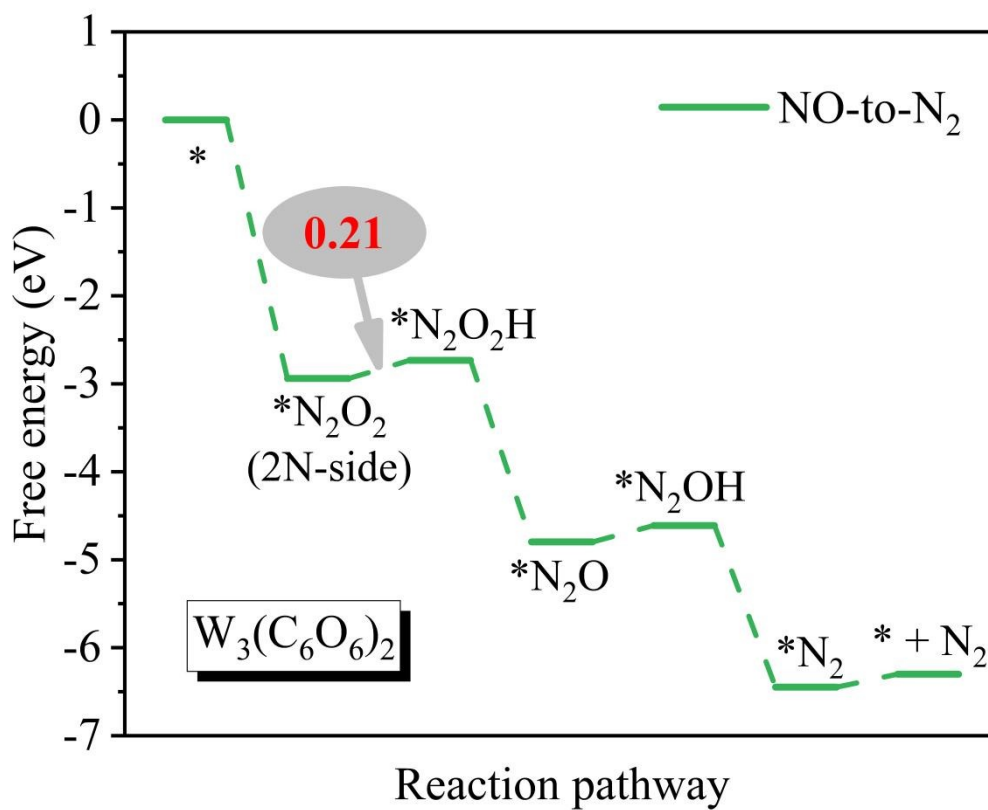

Fig. S26. The free energy diagram of NO reduction to  $\text{N}_2$  on  $\text{W}_3(\text{C}_6\text{O}_6)_2$ .

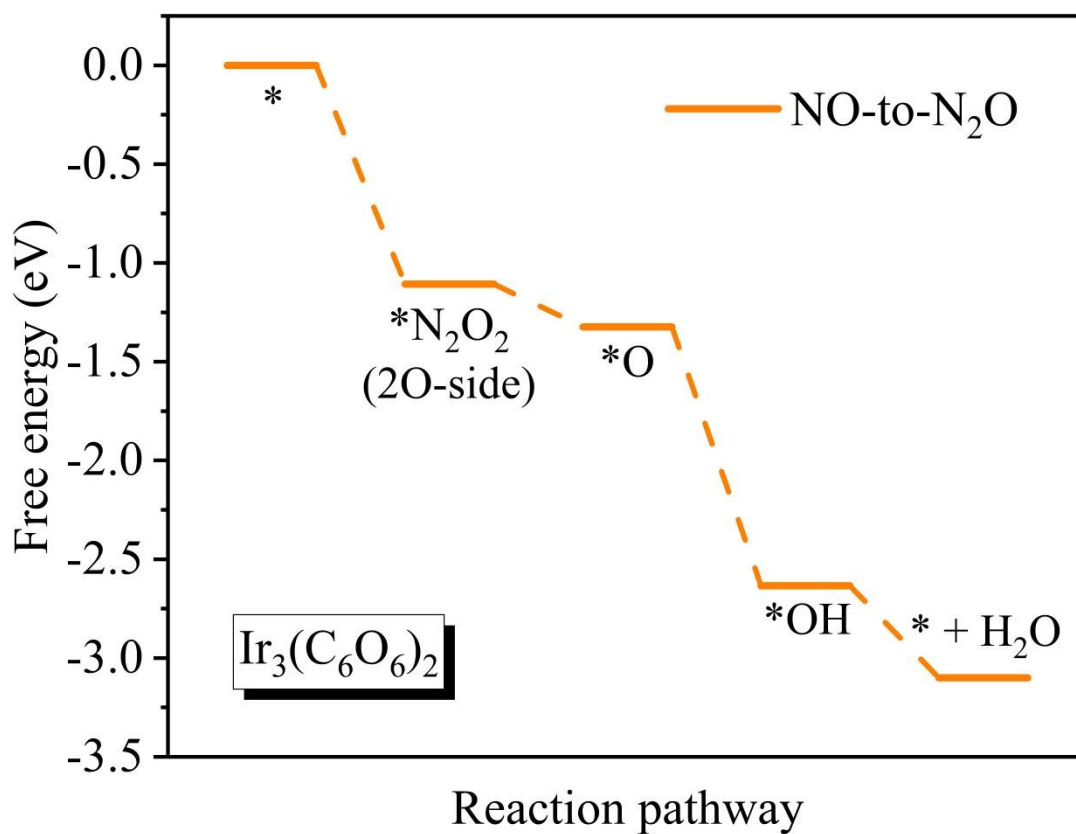

Fig. S27. The free energy diagram of NO reduction to N<sub>2</sub>O on Ir<sub>3</sub>(C<sub>6</sub>O<sub>6</sub>)<sub>2</sub>.

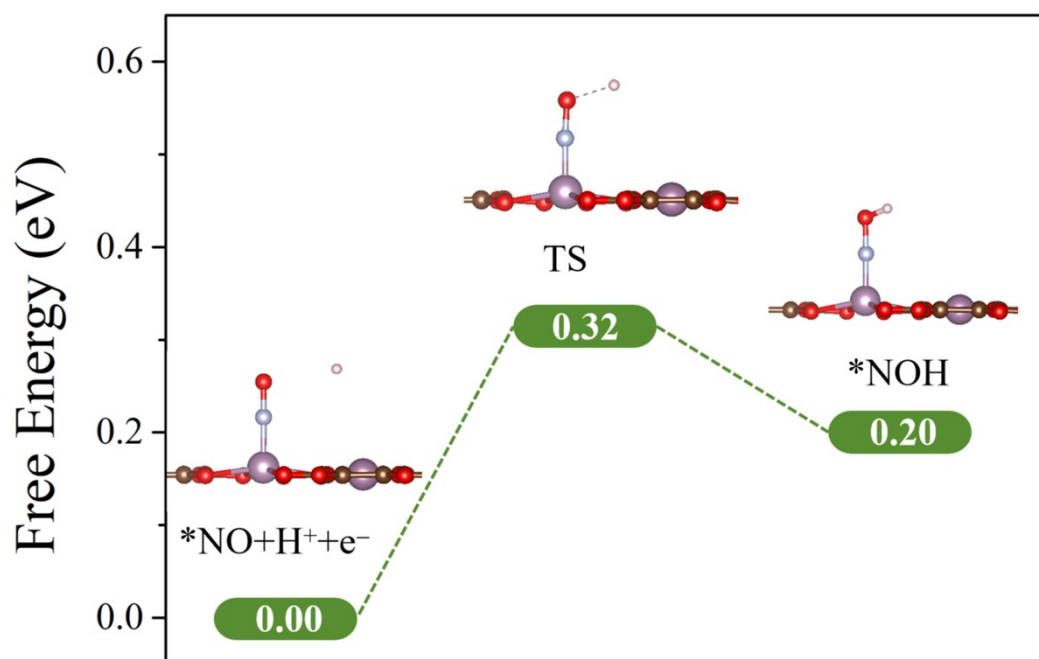

Fig. S28. Kinetic barriers and corresponding atomic structures of the potential limiting step along the most favorable reaction pathways for Mo<sub>3</sub>(C<sub>6</sub>O<sub>6</sub>)<sub>2</sub>.
